# Supplementary material for: Light at night: effect on the daily clock, learning, memory, cognition, and expression of transcripts in different brain regions of rat
Source: Springer Nature journal article supplement (doi:10.1007/s43630-023-00451-z), 2023-06-19
Supplement: 43630_2023_451_MOESM2_ESM.pdf [file 43630_2023_451_MOESM2_ESM.pdf]

| <b>Gene</b>    | <b>F Primer</b>              | <b>R Primer</b>                | <b>Accession No.</b> |
|----------------|------------------------------|--------------------------------|----------------------|
| <i>Bdnf</i>    | 5'- ATTACCTGGATGCCGCAAAC -3' | 5'- TTTTGTCTGCCGCCGTTAC-3'     | AY176065.1           |
| <i>TrkB</i>    | 5'- TTACGTGGGGCTGAAAACC-3'   | 5'- TTGCCGTTCTTCAGAAACGC-3'    | AY265419.1           |
| <i>Gap-43</i>  | 5'- GGCTGCAACCAAATTCAGG - 3' | 5'- TTCTCCACACCATCAGCAAC-3'    | XM_032900206.1       |
| <i>Creb</i>    | 5'- TGGCCTTCAGGTTTTGTGTG-3'  | 5'- CGCCGCAAAAACCTTGTTAC -3'   | NM_133381.4          |
| <i>miR-132</i> | 5'- CCGCCCCCGCGTCTCCAG -3'   | 5'- GAG CGT GGG CGT GCT GCG-3' | NR_031878.1          |
| <i>Ng</i>      | 5'-TCCAAGCCAGACGACGATATTC-3' | AAACTCGCCTGGATTTTGGC           | NM_024140.3          |
| <i>Gsk3</i>    | 5'-TTGGAAGTGCAAAGCAGCTG-3'   | 5'-CAATTCAGCCAACACACAGC-3'     | NM_032080.1          |
| <i>Tnf</i>     | 5'-TCCAACAAGGAGGAGAAGTTC-3'  | 5'-TCTGCTTGGTGGTTTGCTAC-3'     | X66539.1             |
| <i>BA</i>      | 5-AACACGGCATTGTCACCAAC-3'    | 5'-TTTTCACGGTTGGCCTTAGG-3'     | XM_032887061.1       |

Suppl. Table 1: Sequences of the forward and reverse primers used for qPCR analysis.
