# Supplementary material for: Light at night: effect on the daily clock, learning, memory, cognition, and expression of transcripts in different brain regions of rat
Source: Springer Nature journal article supplement (doi:10.1007/s43630-023-00451-z), 2023-06-19
Supplement: 43630_2023_451_MOESM3_ESM.pdf [file 43630_2023_451_MOESM3_ESM.pdf]

Supplementary table 2a: values on 1-way ANOVA.

| Test/Assay                    | Photoperiod                    | Spectrum                       |
|-------------------------------|--------------------------------|--------------------------------|
| Plasma melatonin (LD group)   | $F_{5,24} = 62.20, P < 0.0001$ |                                |
| Plasma melatonin (dLAN group) | $F_{5,24} = 82.26, P < 0.0001$ |                                |
| Plasma melatonin (LL group)   | $F_{5,24} = 1.888, P = 0.1339$ |                                |
| Velocity                      | $F_{2,56} = 13.94, P < 0.0001$ | $F_{2,56} = 2.792, P = 0.0743$ |
| Y Maze                        | $F_{2,14} = 20.11, P < 0.0001$ | $F_{2,14} = 11.73, P = 0.0091$ |
| Nobel object recognition      | $F_{2,14} = 16.04, P = 0.0002$ | $F_{2,14} = 12.15, P = 0.0007$ |
| Hole board test               | $F_{2,14} = 9.852, P = 0.0019$ | $F_{2,14} = 8.976, P = 0.0059$ |
| Morris ware maze              | $F_{2,14} = 27.24, P < 0.0001$ | $F_{2,14} = 14.04, P = 0.0009$ |
| Elevated Plus maze            | $F_{2,14} = 18.19, P < 0.0001$ | $F_{2,14} = 4.124, P = 0.0342$ |
| Passive avoidance test        | $F_{2,14} = 78.56, P < 0.0001$ | $F_{2,14} = 4.820, P = 0.0378$ |
| Radial arm (time required)    | $F_{2,14} = 13.60, P = 0.0004$ | $F_{2,14} = 5.839, P = 0.0155$ |
| Radial arm (unvisited arm)    | $F_{2,14} = 14.43, P = 0.0003$ | $F_{2,14} = 4.415, P = 0.0366$ |

Supplementary table 2b. Values of 2-way ANOVA

| Treatment                      | Time                           | Interaction                    |
|--------------------------------|--------------------------------|--------------------------------|
| $F_{2,72} = 168.8, P < 0.0001$ | $F_{2,72} = 113.0, P < 0.0001$ | $F_{2,72} = 34.27, P < 0.0001$ |
