# Supplementary material for: Light at night: effect on the daily clock, learning, memory, cognition, and expression of transcripts in different brain regions of rat
Source: Springer Nature journal article supplement (doi:10.1007/s43630-023-00451-z), 2023-06-19
Supplement: 43630_2023_451_MOESM4_ESM.pdf [file 43630_2023_451_MOESM4_ESM.pdf]

Table 3a: values of 1 way ANOVA in photoperiod experiment

|              | Hippocampus                  | Thalamus                     | Cortex                       |
|--------------|------------------------------|------------------------------|------------------------------|
| Bdnf         | $F_{2,14}= 14.04, P< 0.0001$ | $F_{2,14}= 23.40, P< 0.0001$ | $F_{2,14}= 11.04, P= 0.0016$ |
| Trk          | $F_{2,14}= 12.79, P= 0.0007$ | $F_{2,14}= 9.719, P= 0.0031$ | $F_{2,14}= 24.62, P< 0.0001$ |
| Gap43        | $F_{2,14}= 10.77, P= 0.0017$ | $F_{2,14}= 15.08, P= 0.0005$ | $F_{2,14}= 7.608, P= 0.0058$ |
| Ng           | $F_{2,14}= 22.53, P< 0.0001$ | $F_{2,14}= 12.22, P= 0.0013$ | $F_{2,14}= 12.98, P= 0.0006$ |
| Mir-132      | $F_{2,14}= 11.09, P= 0.0173$ | $F_{2,14}= 25.62, P< 0.0001$ | $F_{2,14}= 5.089, P= 0.0218$ |
| Crebp        | $F_{2,14}= 5.925, P= 0.0001$ | $F_{2,14}= 14.76, P= 0.0006$ | $F_{2,14}= 8.032, P= 0.0043$ |
| Gsk3 $\beta$ | $F_{2,14}= .7872, P= 0.4757$ | $F_{2,14}= 13.07, P= 0.0010$ | $F_{2,14}= 11.27, P= 0.0012$ |
| Tnf $\alpha$ | $F_{2,14}= 11.04, P= 0.0016$ | $F_{2,14}= 118.3, P< 0.0001$ | $F_{2,14}= 23.40, P< 0.0001$ |

Table 3b: Values of 1-way ANOVA in spectrum experiment

|              | Hippocampus                  | Thalamus                     | Cortex                       |
|--------------|------------------------------|------------------------------|------------------------------|
| Bdnf         | $F_{2,14}= 24.04, P< 0.0001$ | $F_{2,14}= 23.04, P< 0.0001$ | $F_{2,14}= 45.34, P< 0.0001$ |
| Trk          | $F_{2,14}= 16.20, P= 0.0004$ | $F_{2,14}= 22.03, P< 0.0001$ | $F_{2,14}= 21.72, P= 0.0001$ |
| Gap43        | $F_{2,14}= 13.19, P= 0.0009$ | $F_{2,14}= 41.41, P< 0.0001$ | $F_{2,14}= 6.455, P= 0.0125$ |
| Ng           | $F_{2,14}= 48.12, P< 0.0001$ | $F_{2,14}= 19.67, P=0.0002$  | $F_{2,14}= 20.84, P= 0.0001$ |
| Mir-132      | $F_{2,14}= 13.00, P= 0.0010$ | $F_{2,14}= 33.75, P< 0.0001$ | $F_{2,14}= 6.128, P= 0.0147$ |
| Crebp        | $F_{2,14}= 29.82, P< 0.0001$ | $F_{2,14}= 18.07, P= 0.0002$ | $F_{2,14}= 5.991, P= 0.0157$ |
| Gsk3 $\beta$ | $F_{2,14}= 43.83, P< 0.0001$ | $F_{2,14}= 7.947, P= 0.0063$ | $F_{2,14}= 15.24, P= 0.0005$ |
| Tnf $\alpha$ | $F_{2,14}= 11.34, P= 0.0014$ | $F_{2,14}= 11.04, P= 0.0016$ | $F_{2,14}= 28.42, P< 0.0001$ |
